# Supplementary material
Source: publisher site journal article supplement (https://www.dovepress.com/article/582323)
Supplement: Supplementary file 1 [file 582323%20Revised%20Supplementary.docx]

**Table S1.** Searching Strategy

| **Database** | **Concept** | **Search Term** | **Result** | **Date** |
| --- | --- | --- | --- | --- |
| PubMed | Concept 1 | "plants, medicinal"[MeSH Terms] OR ("plants"[All Fields] AND "medicinal"[All Fields]) OR "medicinal plants"[All Fields] OR ("medicinal"[All Fields] AND "plants"[All Fields]) OR "medicinal plants"[Title/Abstract] OR ("plant s"[All Fields] OR "planted"[All Fields] OR "planting"[All Fields] OR "plantings"[All Fields] OR "plants"[MeSH Terms] OR "plants"[All Fields] OR "plant"[All Fields]) OR "plants"[Title/Abstract] OR (("diet"[MeSH Terms] OR "diet"[All Fields] OR "dietary"[All Fields] OR "dietaries"[All Fields]) AND ("plant s"[All Fields] OR "planted"[All Fields] OR "planting"[All Fields] OR "plantings"[All Fields] OR "plants"[MeSH Terms] OR "plants"[All Fields] OR "plant"[All Fields])) OR "dietary plants"[Title/Abstract] | 1,383,449 | 20/07/2025 |
| Concept 2 | "inhibit"[All Fields] OR "inhibitable"[All Fields] OR "inhibite"[All Fields] OR "inhibited"[All Fields] OR "inhibites"[All Fields] OR "inhibiting"[All Fields] OR "inhibition, psychological"[MeSH Terms] OR ("inhibition"[All Fields] AND "psychological"[All Fields]) OR "psychological inhibition"[All Fields] OR "inhibition"[All Fields] OR "inhibitions"[All Fields] OR "inhibitive"[All Fields] OR "inhibits"[All Fields] OR "inhibit"[Title]) AND ("suppress"[All Fields] OR "suppressed"[All Fields] OR "suppresser"[All Fields] OR "suppresses"[All Fields] OR "suppressibility"[All Fields] OR "suppressible"[All Fields] OR "suppressing"[All Fields] OR "suppression"[All Fields] OR "suppressions"[All Fields] OR "suppressive"[All Fields] OR "suppressives"[All Fields])) OR "suppress"[Title/Abstract]) AND ("reduce"[All Fields] OR "reduced"[All Fields] OR "reduces"[All Fields] OR "reducing"[All Fields])) OR "reduce"[Title/Abstract] | 1,123,767 | 20/07/2025 |
| Concept 3 | “nitric oxide production”[All Fields] OR “nitric oxide production”[Title/Abstract]) AND “nitric oxide synthase” OR “nitric oxide synthase”[Title/Abstract]) | 72,822 | 20/07/2025 |
| Concept 4 | “preclinical studies”[All Fields] OR “preclinical studies”[Title/Abstract])) AND “in vitro”[All Fields] OR “in vitro”[Title/Abstract])) AND “in vivo”[All Fields] OR “in vivo”[Title/Abstract])) NOT “in silico” [All Fields] OR “in silico”[Title/Abstract]) | 1,252,844 | 20/07/2025 |
| Concept 5 | “clinical studies”[All Fields] OR “clinical studies”[Title/Abstract])) AND “clinical trials”[All Fields] OR “clinical trials”[Title/Abstract]) | 1,390,071 | 20/07/2025 |
| All concept for Preclinical studies (Concept 1+2+3+4 and Filters) | ((((((((medicinal plants) OR (medicinal plants[Title/Abstract])) OR (plants)) OR (plants[Title/Abstract])) OR (dietary plants)) OR (dietary plants[Title/Abstract])) AND ((((((inhibit) OR (inhibit[Title])) AND (suppress)) OR (suppress[Title/Abstract])) AND (reduce)) OR (reduce[Title/Abstract]))) AND ((((nitric oxide production) OR (nitric oxide production[Title/Abstract]) ) AND (nitric oxide synthase)) OR (nitric oxide synthase[Title/Abstract]))) AND ((((((((Preclinical studies) OR (preclinical studies[Title/Abstract])) AND (in vitro)) OR (in vitro[Title/Abstract])) AND (in vivo)) OR (in vivo[Title/Abstract])) NOT (in silico)) OR (in silico[Title/Abstract])) Filters: in the last 10 years, Free full text | 28 | 20/07/2025 |
| All concept for Clinical studies (Concept 1+2+3+5 and Filters) | ((((((((medicinal plants) OR (medicinal plants[Title/Abstract])) OR (plants)) OR (plants[Title/Abstract])) OR (dietary plants)) OR (dietary plants[Title/Abstract])) AND ((((((inhibit) OR (inhibit[Title])) AND (suppress)) OR (suppress[Title/Abstract])) AND (reduce)) OR (reduce[Title/Abstract]))) AND ((((nitric oxide production) OR (nitric oxide production[Title/Abstract]) ) AND (nitric oxide synthase)) OR (nitric oxide synthase[Title/Abstract]))) AND ((((clinical studies) OR (clinical studies[Title/Abstract])) AND (clinical trials) ) OR (clinical trials[Title])) Filters: in the last 10 years, Free full text | 2 | 20/07/2025 |
| Scopus | Concept 1 | ALL ( "medicinal plants" ) OR TITLE-ABS-KEY ( "medicinal plants" ) OR ALL ( plants ) OR TITLE-ABS-KEY ( plants ) OR ALL ( "dietary plants" ) OR TITLE-ABS-KEY ( "dietary plants" ) | 7,830,697 | 20/07/2025 |
| Concept 2 | ALL ( inhibit ) OR TITLE-ABS-KEY ( inhibit ) AND ALL ( suppress ) OR TITLE-ABS-KEY ( suppress ) AND ALL ( reduce ) OR TITLE-ABS-KEY ( reduce ) | 29,350 | 20/07/2025 |
| Concept 3 | ALL ( "nitric oxide production" ) OR TITLE-ABS-KEY ( "nitric oxide production" ) AND ALL ( "nitric oxide synthase" ) OR TITLE-ABS-KEY ( "nitric oxide synthase" ) | 71,073 | 20/07/2025 |
| Concept 4 | ALL ( "clinical studies" ) OR TITLE-ABS-KEY ( "clinical studies" ) AND ALL ( "clinical trials" ) OR TITLE-ABS-KEY ( "clinical trials" ) | 1,194,891 | 20/07/2025 |
| All concept for Preclinical studies (Concept 1+2+3 and Filters) | ( ALL ( "Medicinal plants" ) OR TITLE-ABS-KEY ( "medicinal plants" ) OR ALL ( Plants ) OR TITLE-ABS-KEY ( Plants ) OR ALL ( "Dietary plants" ) OR TITLE-ABS-KEY ( "Dietary plants" ) ) AND ( ALL ( inhibit ) OR TITLE-ABS-KEY ( inhibit ) AND ALL ( suppress ) OR TITLE-ABS-KEY ( suppress ) AND ALL ( reduce ) OR TITLE-ABS-KEY ( reduce ) ) AND ( ALL ( "nitric oxide production" ) OR TITLE-ABS-KEY ( "nitric oxide production" ) AND ALL ( "nitric oxide synthase" ) OR TITLE-ABS-KEY ( "nitric oxide synthase" ) ) AND PUBYEAR > 2014 AND PUBYEAR < 2026 AND ( LIMIT-TO ( DOCTYPE , "ar" ) ) AND ( LIMIT-TO ( LANGUAGE , "English" ) ) AND ( LIMIT-TO ( OA , "all" ) ) | 28 | 20/07/2025 |
| All concept for Clinical studies (Concept 1+2+3+5 and Filters) | ( ALL ( "medicinal plants" ) OR TITLE-ABS-KEY ( "medicinal plants" ) OR ALL ( plants ) OR TITLE-ABS-KEY ( plants ) OR ALL ( "dietary plants" ) OR TITLE-ABS-KEY ( "dietary plants" ) ) AND ( ALL ( inhibit ) OR TITLE-ABS-KEY ( inhibit ) AND ALL ( suppress ) OR TITLE-ABS-KEY ( suppress ) AND ALL ( reduce ) OR TITLE-ABS-KEY ( reduce ) ) AND ( ALL ( "nitric oxide production" ) OR TITLE-ABS-KEY ( "nitric oxide production" ) AND ALL ( "nitric oxide synthase" ) OR TITLE-ABS-KEY ( "nitric oxide synthase" ) ) AND ( ALL ( "clinical studies" ) OR TITLE-ABS-KEY ( "clinical studies" ) AND ALL ( "clinical trials" ) OR TITLE-ABS-KEY ( "clinical trials" ) ) AND PUBYEAR > 2014 AND PUBYEAR < 2026 AND ( LIMIT-TO ( OA , "all" ) ) AND ( LIMIT-TO ( DOCTYPE , "ar" ) ) AND ( LIMIT-TO ( LANGUAGE , "English" ) ) | 3 | 20/07/2025 |
